# Supplementary material for: Outcomes of Revision Surgery for Pseudarthrosis After Anterior Cervical Fusion: Case Series and Systematic Review
Source: PubMed Central journal article supplement — Global Spine J. 2019 Aug 1;10(5):559–70. doi: 10.1177/2192568219863808 (PMC7359693; doi:10.1177/2192568219863808), 2019-08-01
Supplement: Appendix_-_Search_Strategy.pdf [file Appendix_-_Search_Strategy.pdf]

## PubMed: 419 on 10.23.2018

Section 1: 7917

"pseudarthrosis"[MeSH Terms]  
OR "pseudarthrosis"[TW]  
OR "pseudoarthrosis"[TW]  
OR "Degenerative Cervical Spine Diseases"[TW]

**AND**

Section 2 : 43227

((anterior[TW] AND ("neck"[MeSH Terms] OR "neck"[TW] OR "cervical"[TW]) AND ("discectomy"[MeSH Terms] OR "diskectomy"[TW] OR "discectomy"[TW]) AND "fusion"[TW])  
OR "Anterior cervical discectomy fusion"[TW]  
OR acdf[TW]  
OR (("neck"[MeSH Terms] OR "neck"[TW] OR "cervical"[TW]) AND disc[TW] AND ("prosthesis implantation"[MeSH Terms] OR "prosthesis"[TW]))  
OR "cervical disc prosthesis"[TW]  
OR "Cervical Vertebrae/surgery"[Mesh]  
OR "Discectomy"[Mesh]  
OR "cervical vertebrae"[MeSH Terms]  
OR ("cervical"[TW] AND "vertebrae"[TW])  
OR "cervical vertebrae"[TW]

**AND**

Section 3: 3557670

"treatment outcome"[MeSH Terms]  
OR ("treatment"[TW] OR "Clinical"[TW]) AND "outcome"[TW]  
OR "treatment outcome"[TW]  
OR "clinical outcome"[tw]  
OR "surveys and questionnaires"[MeSH Terms]  
OR "survey"[TW]  
OR "questionnaire"[TW]  
OR "neck disability index"[TW]  
OR NDI[TW]  
OR "SF-36"[TW]  
OR "SF-12"[TW]  
OR "short form health survey 36"[TW]  
OR "short form health survey 12"[TW]  
OR nurick[TW]  
OR "modified Japanese orthopedic association score"[TW]  
OR mJOA[TW]  
OR "visual analog scale"[TW]  
OR "VAS"[TW]  
OR "Oswestry Disability Index"[TW]  
OR "ODI"[TW]  
OR "success rates"[TW]

OR "indications"[TW]  
OR "radiography"[Mesh]

## Embase 507 results on 10.23.2018

Section 1: 14,777

'pseudarthrosis'/exp  
OR pseudarthrosis:ti,ab,de,tn  
OR pseudoarthrosis:ti,ab,de,tn  
OR 'degenerative cervical spine diseases':ti,ab,de,tn

AND

Section 2) 23,784

(anterior:ti,ab,de,tn AND ('neck'/exp OR neck:ti,ab,de,tn OR cervical:ti,ab,de,tn) AND ('discectomy'/exp  
OR diskectomy:ti,ab,de,tn OR discectomy:ti,ab,de,tn) AND fusion:ti,ab,de,tn)  
OR "Anterior cervical discectomy fusion":ti,ab,de,tn  
OR acdf:ti,ab,de,tn  
OR (('neck'/exp OR neck:ti,ab,de,tn OR cervical:ti,ab,de,tn) AND disc:ti,ab,de,tn AND ('prosthesis  
implantation'/exp OR prosthesis:ti,ab,de,tn))  
OR "cervical disc prosthesis":ti,ab,de,tn  
OR ('Cervical Vertebra'/exp AND 'surgery'/exp)  
OR 'discectomy'/exp  
OR 'Cervical Vertebra'/exp  
OR (Cervical:ti,ab,de,tn AND Vertebra:ti,ab,de,tn)  
OR 'Cervical Vertebra':ti,ab,de,tn

AND

Section 3) 5,052,856

'treatment outcome'/exp  
OR ((treatment:ti,ab,de,tn OR Clinical:ti,ab,de,tn) AND outcome:ti,ab,de,tn)  
OR 'treatment outcomes':ti,ab,de,tn  
OR 'clinical outcomes':ti,ab,de,tn  
OR 'questionnaire'/exp  
OR survey:ti,ab,de,tn  
OR questionnaire:ti,ab,de,tn  
OR 'neck disability index':ti,ab,de,tn  
OR NDI:ti,ab,de,tn  
OR 'SF-36':ti,ab,de,tn  
OR 'SF-12':ti,ab,de,tn  
OR 'short form health survey 36':ti,ab,de,tn  
OR 'short form health survey 12':ti,ab,de,tn  
OR nurick:ti,ab,de,tn  
OR 'modified Japanese orthopedic association score':ti,ab,de,tn  
OR mJOA:ti,ab,de,tn  
OR 'visual analog scale':ti,ab,de,tn  
OR 'visual analog scale'/exp  
OR 'VAS':ti,ab,de,tn  
OR 'Oswestry Disability Index':ti,ab,de,tn

OR 'Oswestry Disability Index'/exp  
OR 'ODI':ti,ab,de,tn  
OR 'success rates':ti,ab,de,tn  
OR 'indications':ti,ab,de,tn  
OR 'radiography'/exp

## **Cochrane** 35 clinical trials

Section 1: 216

[mh pseudarthrosis]  
OR pseudarthrosis:ti,ab,kw  
OR pseudoarthrosis:ti,ab,kw  
OR "Degenerative Cervical Spine Diseases":ti,ab,kw

AND

Section 2: 1414

(anterior:ti,ab,kw AND ([mh neck] OR neck:ti,ab,kw OR cervical:ti,ab,kw) AND ([mh discectomy] OR iscectomy:ti,ab,kw OR discectomy:ti,ab,kw) AND fusion:ti,ab,kw)  
OR "Anterior cervical discectomy fusion":ti,ab,kw  
OR acdf:ti,ab,kw  
OR (([mh neck] OR neck:ti,ab,kw OR cervical:ti,ab,kw) AND disc:ti,ab,kw AND ([mh "prosthesis implantation"] OR prosthesis:ti,ab,kw))  
OR "cervical disc prosthesis":ti,ab,kw  
OR ([mh Cervical Vertebrae] AND [mh surgery])  
OR [mh Discectomy]  
OR [mh "cervical vertebrae"]  
OR (cervical:ti,ab,kw AND vertebrae:ti,ab,kw)  
OR "cervical vertebrae":ti,ab,kw

AND

Section 3: 356362

[mh "treatment outcome"]  
OR ((treatment:ti,ab,kw OR Clinical:ti,ab,kw) AND outcome:ti,ab,kw)  
OR "treatment outcomes":ti,ab,kw  
OR "clinical outcomes":ti,ab,kw  
OR [mh "surveys and questionnaires"]  
OR survey:ti,ab,kw  
OR questionnaire:ti,ab,kw  
OR "neck disability index":ti,ab,kw  
OR NDI:ti,ab,kw  
OR SF-36:ti,ab,kw  
OR SF-12:ti,ab,kw  
OR "short form health survey 36":ti,ab,kw  
OR "short form health survey 12":ti,ab,kw  
OR nurick:ti,ab,kw

OR "modified Japanese orthopedic association score":ti,ab,kw

OR mJOA:ti,ab,kw

OR "visual analog scale":ti,ab,kw

OR VAS:ti,ab,kw

OR "Oswestry Disability Index":ti,ab,kw

OR ODI:ti,ab,kw

OR "success rates":ti,ab,kw

OR indications:ti,ab,kw

OR [mh radiography]
